# Supplementary material for: Pentacyclic Triterpenoids from Sabia discolor Dunn and Their α-Glycosidase Inhibitory Activities
Source: MDPI journal article supplement (doi:10.3390/molecules27072161), 2022-03-27
Supplement: s1 [file s1]

## Supporting Information

# Pentacyclic triterpenoids from *Sabia discolor* Dunn and their $\alpha$ -glycosidase inhibitory activities

Jin-Hong Ma<sup>1,2,3</sup>, Dan Hu<sup>1,2</sup>, Lu-Lu Deng<sup>1,2</sup>, Jiang Li<sup>1,2</sup>, Xiao-Jiang Hao<sup>1,2,4</sup>, Shu-Zhen Mu<sup>1,2\*</sup>

<sup>1</sup> State Key Laboratory of Functions and Applications of Medicinal Plants, Guizhou Medical University, Guiyang 550014, China;  
jinhongma2022@163.com (J.H.M.); danhu1996@163.com (D.H.); luludeng@gzcnpcn (L.L.D.)  
jiangli@gzcnpcn (J.L.); haoxj@mail.kib.ac.cn (X.J.H.)

<sup>2</sup> The Key Laboratory of Chemistry for Natural Products of Guizhou Province and Chinese Academy of Sciences, Guiyang 550014, China

<sup>3</sup> School of Pharmacy, Guizhou Medical University, Guiyang 550025, China

<sup>4</sup> Kunming Institute of Botany, Chinese Academy of Sciences (CAS), Kunming 650201, China

\* Correspondence: muzi0558@126.com

**1D, 2D NMR, HRMS and IR spectra data  
of compounds 1, 4, 7, 8 and 9**

## Compound 1

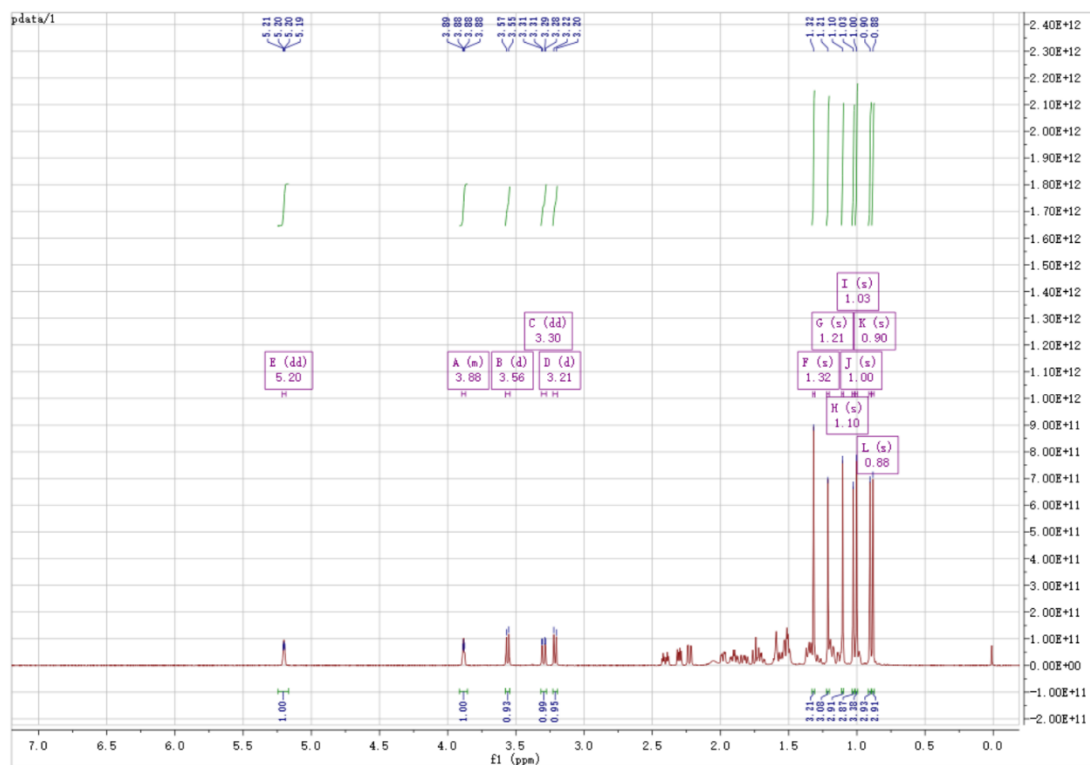

Figure S1. <sup>1</sup>H NMR spectrum of compound **1** in CDCl<sub>3</sub> (600 MHz).

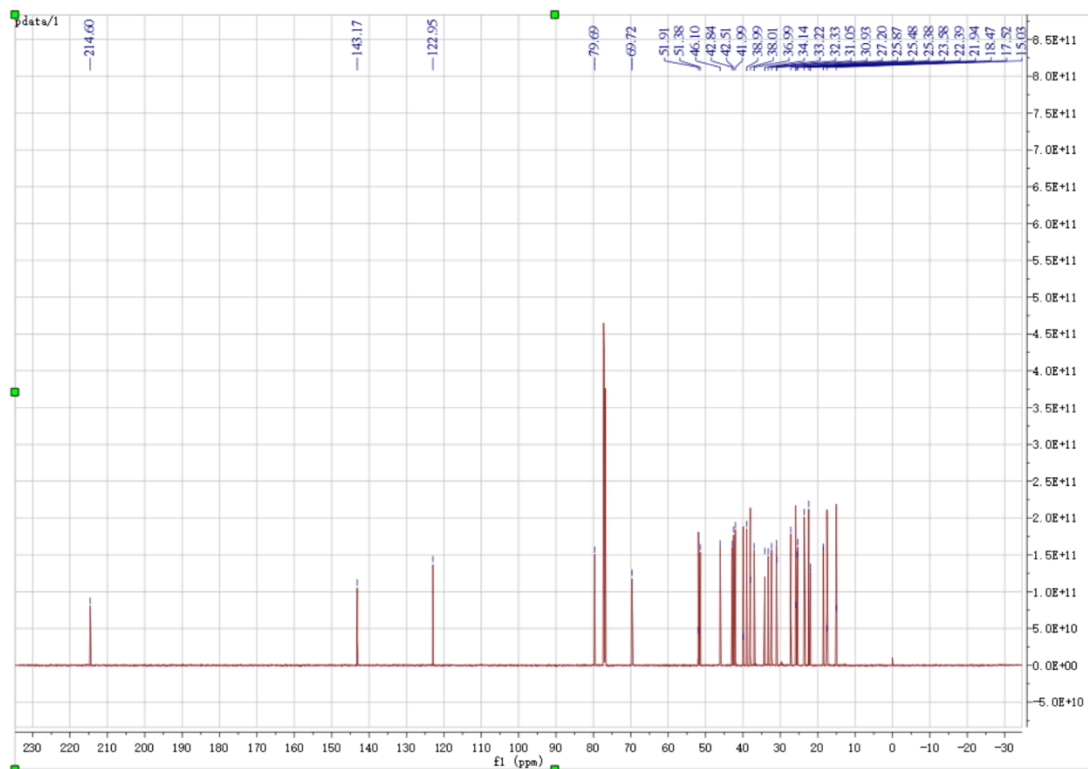

Figure S2. <sup>13</sup>C NMR spectrum of compound **1** in CDCl<sub>3</sub> (150 MHz).

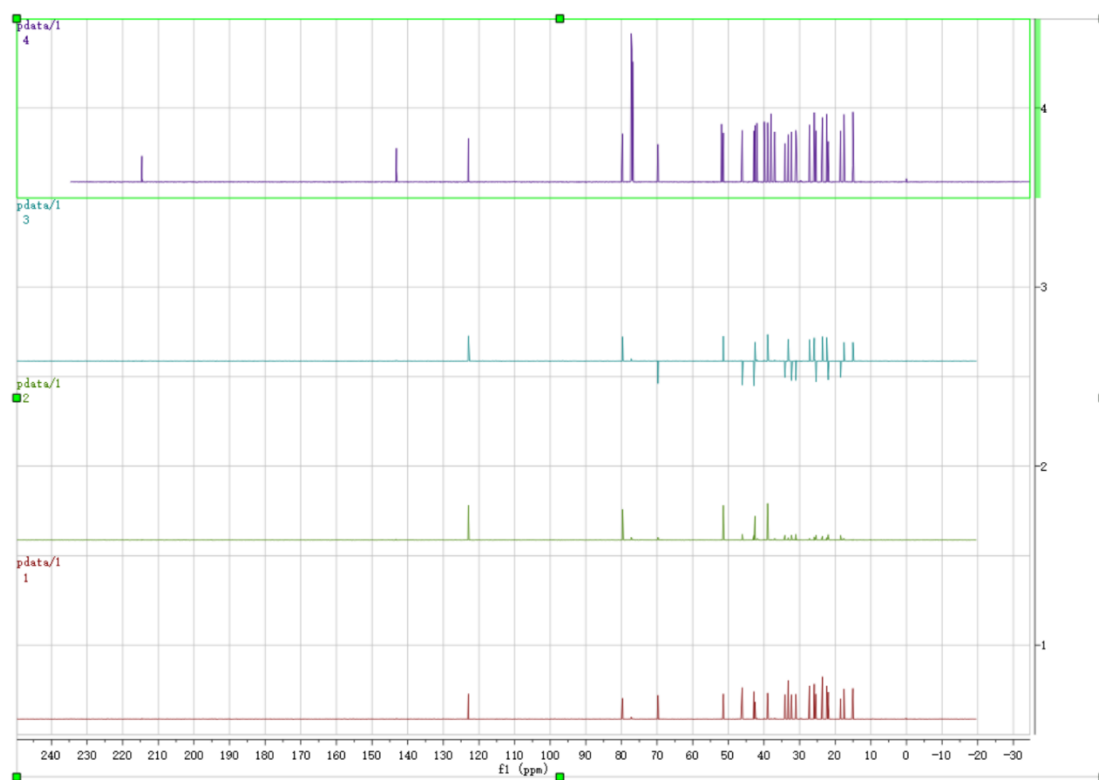

**Figure S3.** DEPT of compound **1** in  $\text{CDCl}_3$  (150 MHz)

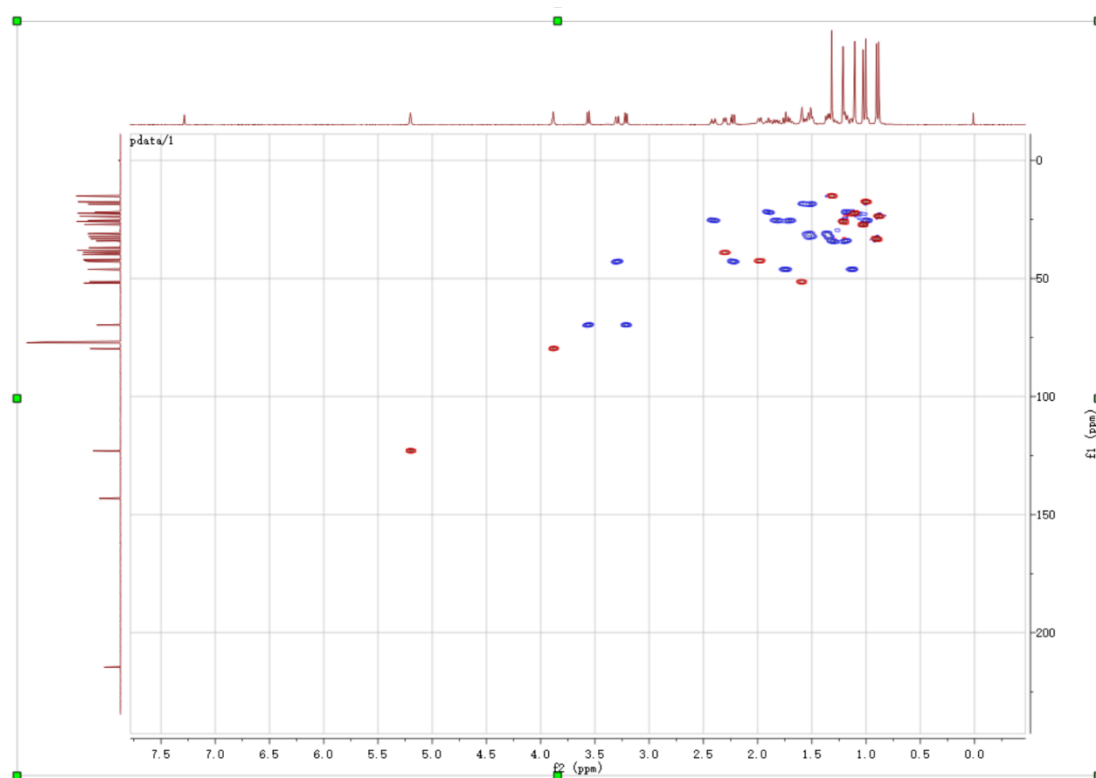

**Figure S4.** HSQC spectrum of compound **1** in  $\text{CDCl}_3$

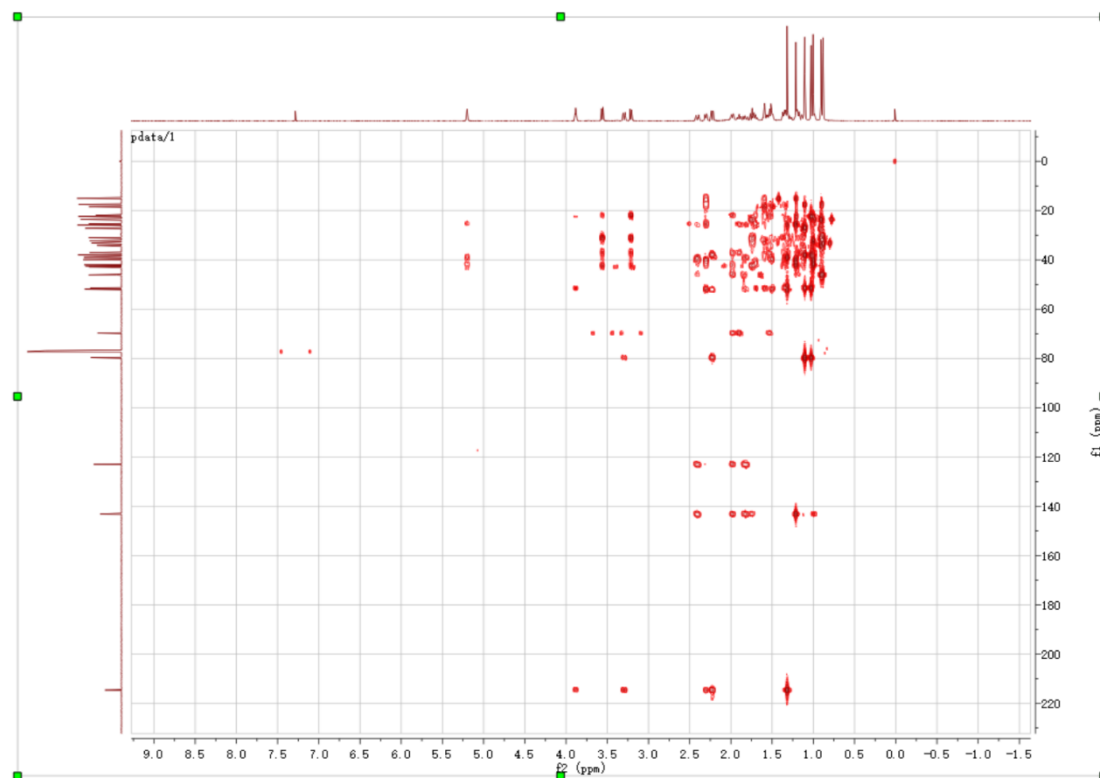

**Figure S5.** HMBC spectrum of compound **1** in CDCl<sub>3</sub>

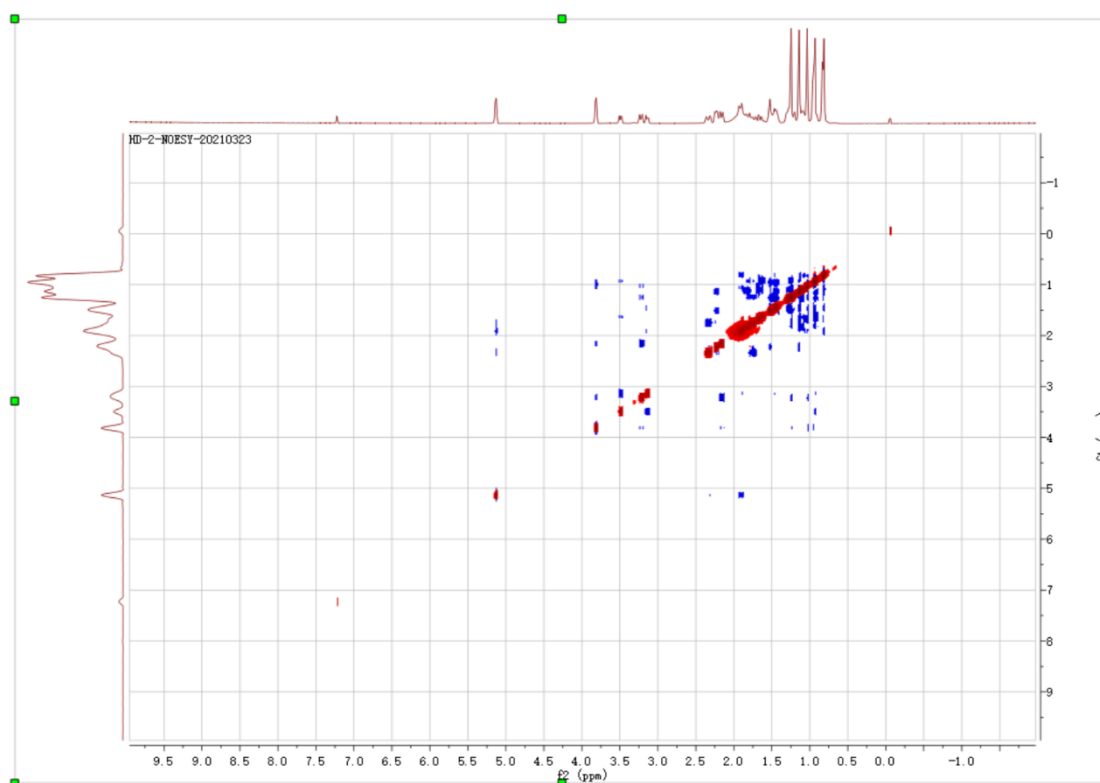

**Figure S6.** NOESY spectrum of compound **1** in CDCl<sub>3</sub>.

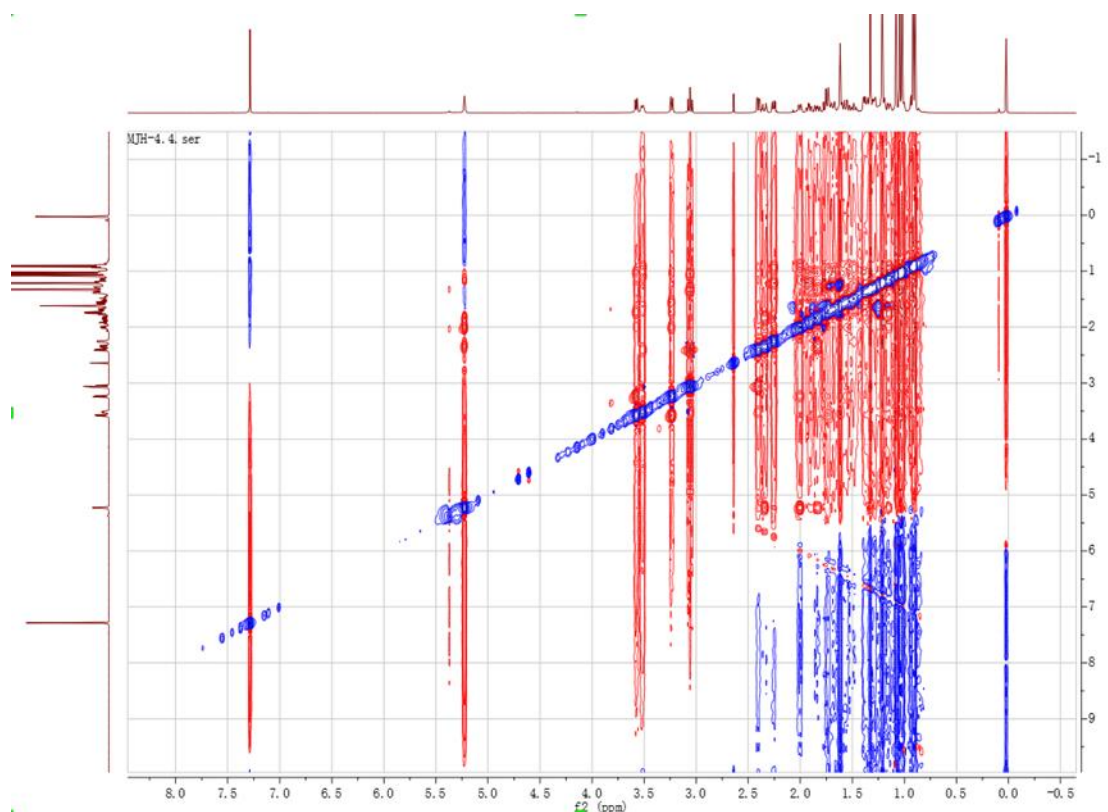

**Figure S7.** NOESY spectrum of compound **4** in  $\text{CDCl}_3$ .

HD-2 #9 RT: 0.04 AV: 1 NL: 3.45E7  
T: FTMS + p ESI Full ms [120.0000-1800.0000]

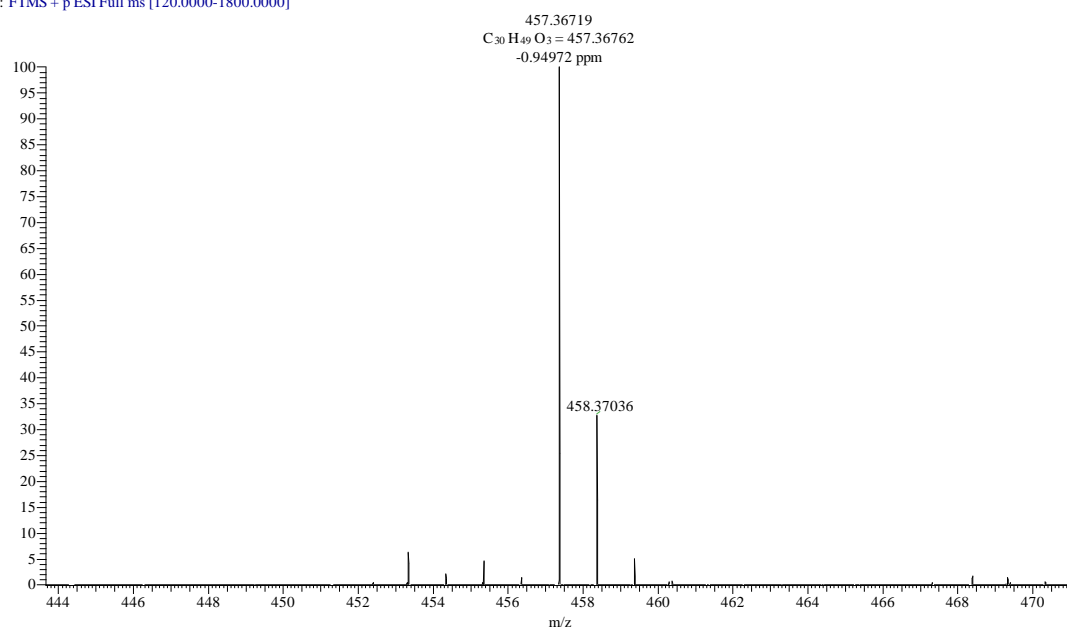

**Figure S8.** HRMS of compound **1** in  $\text{CDCl}_3$

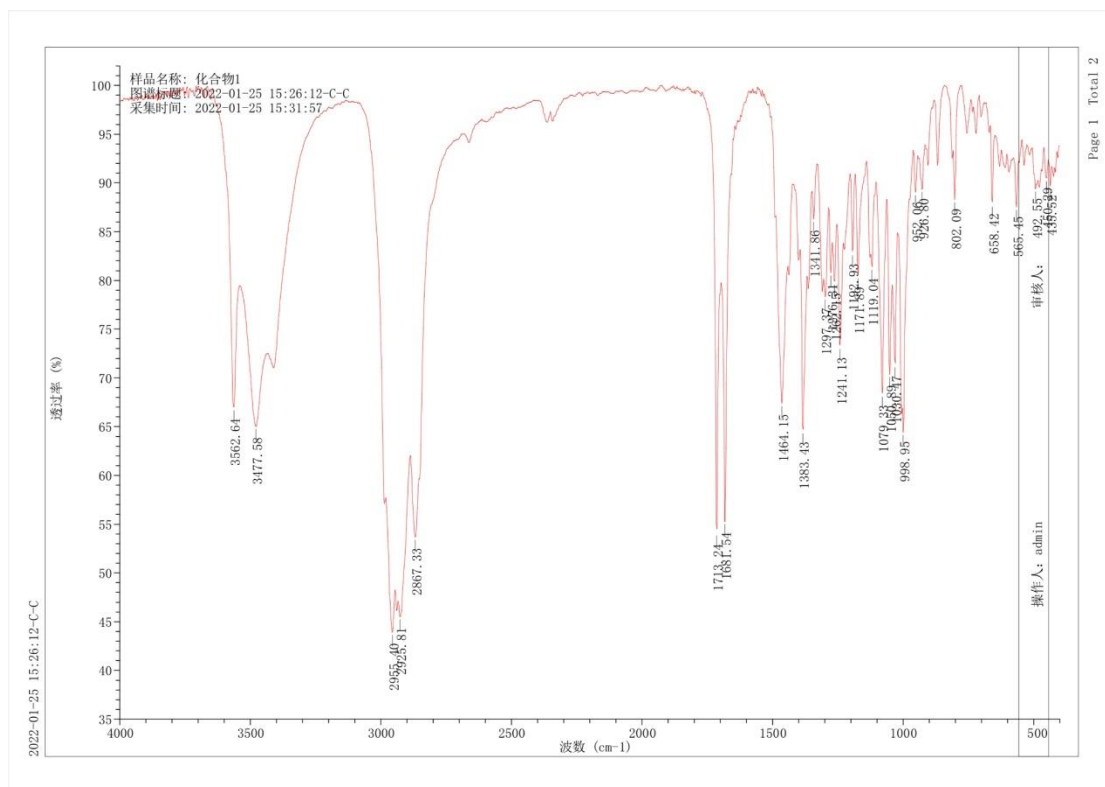

Figure S9. IR spectrum of compound 1

| 波数 (cm <sup>-1</sup> ) | %T    |
|------------------------|-------|
| 435.52                 | 89.71 |
| 450.29                 | 90.47 |
| 492.55                 | 89.39 |
| 565.45                 | 87.49 |
| 658.42                 | 87.83 |
| 802.09                 | 88.29 |
| 926.80                 | 89.33 |
| 952.06                 | 89.01 |
| 998.95                 | 64.40 |
| 1030.47                | 71.36 |
| 1050.89                | 70.36 |
| 1079.33                | 68.33 |
| 1119.04                | 81.36 |
| 1171.89                | 80.47 |
| 1192.93                | 82.85 |
| 1241.13                | 73.23 |
| 1262.15                | 79.80 |
| 1276.31                | 80.79 |
| 1297.37                | 78.31 |
| 1341.86                | 86.28 |
| 1383.43                | 64.56 |
| 1464.15                | 67.37 |
| 1681.54                | 55.26 |
| 1713.24                | 54.09 |
| 2867.33                | 53.68 |
| 2925.81                | 45.51 |
| 2955.40                | 43.89 |
| 3477.58                | 65.03 |
| 3562.64                | 66.94 |

Figure S10. IR data of compound 1

**Figure S12.**  $^{13}\text{C}$  NMR spectrum of compound **7** in  $\text{C}_5\text{D}_5\text{N}$  (150 MHz)



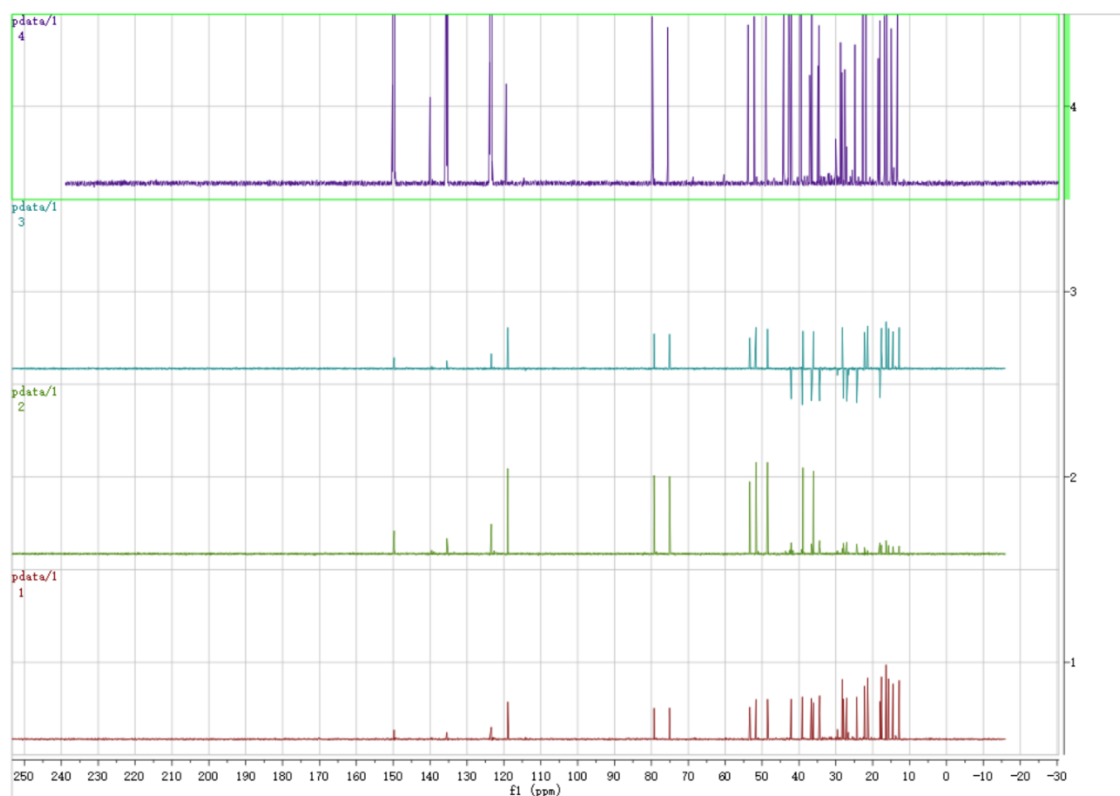

**Figure S13.** DEPT of compound **7** in  $C_5D_5N$  (150 MHz)

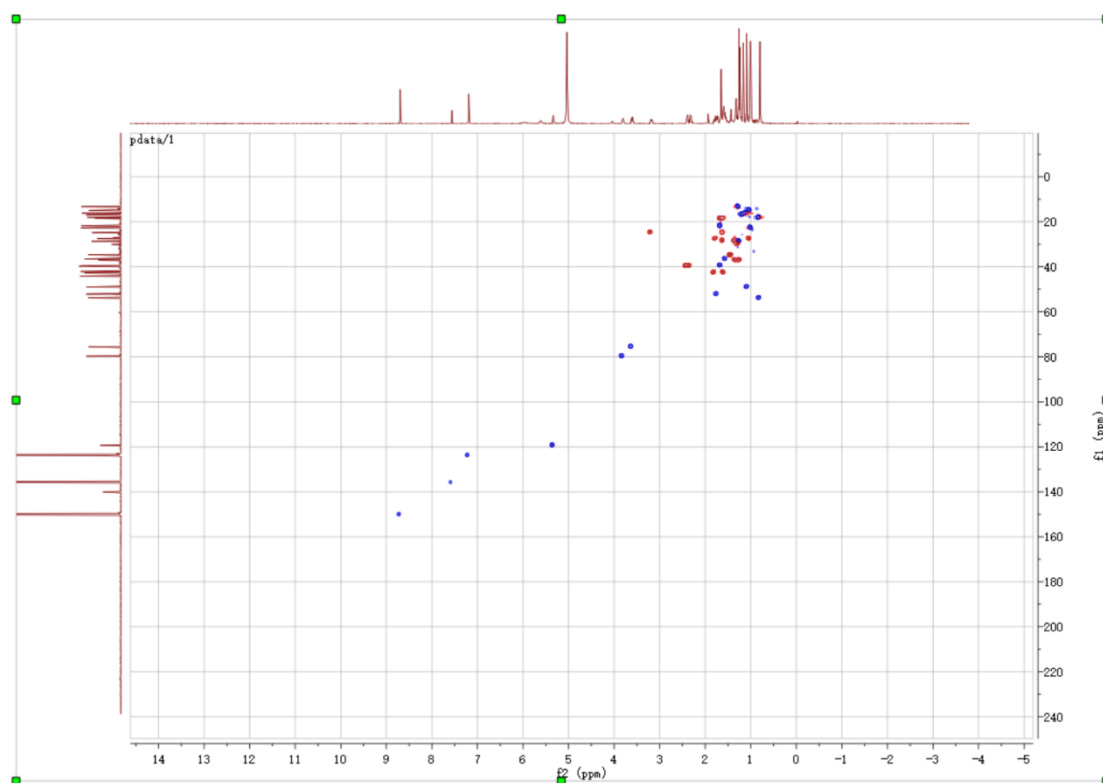

**Figure S14.** HSQC spectrum of compound **7** in  $C_5D_5N$

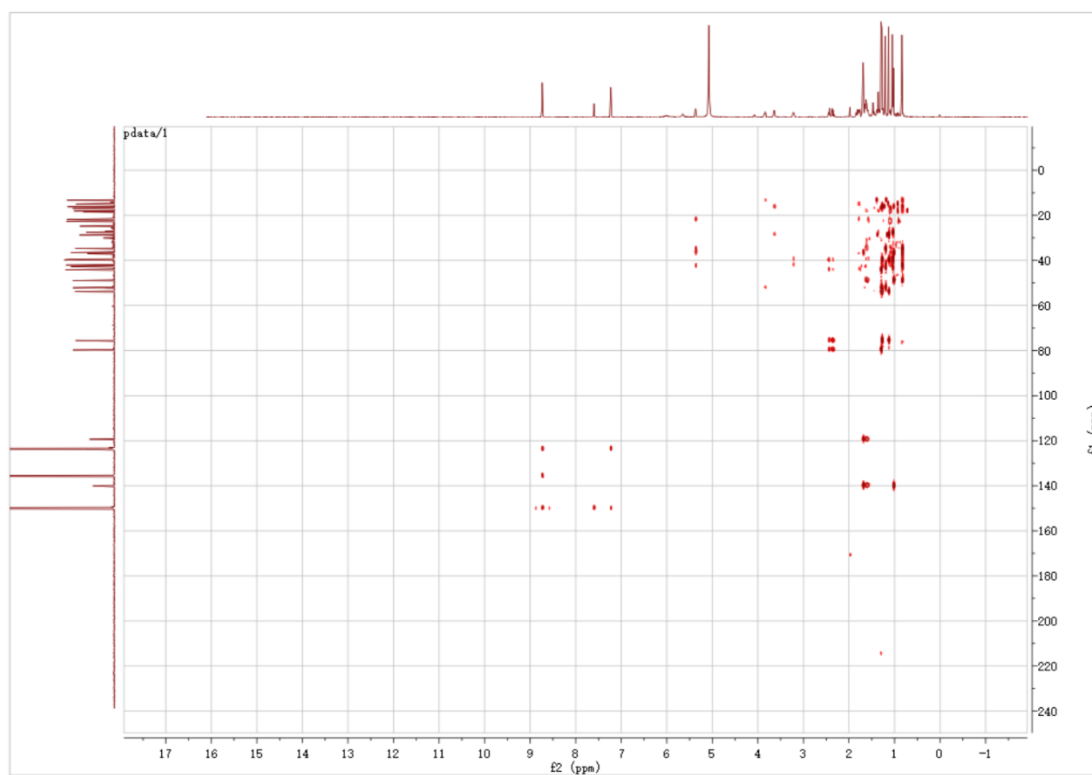

**Figure S15.** HMBC spectrum of compound **7** in C<sub>5</sub>D<sub>5</sub>N

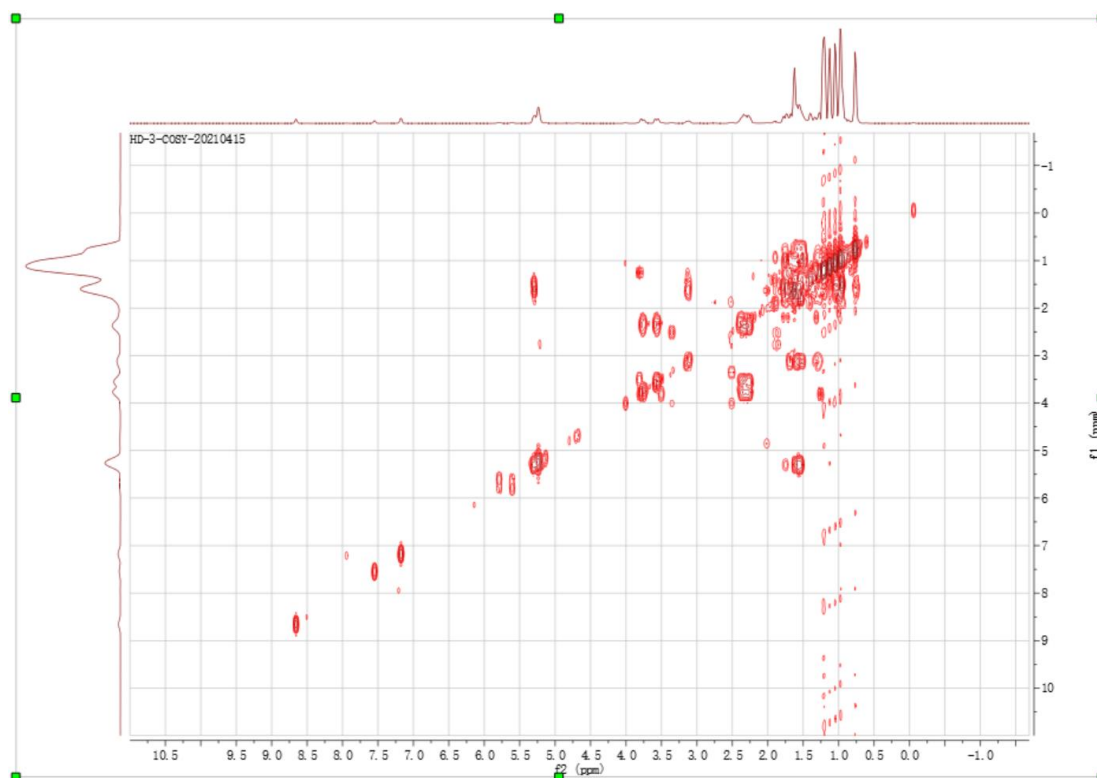

**Figure S16.** <sup>1</sup>H-<sup>1</sup>H COSY spectrum of compound **7** in C<sub>5</sub>D<sub>5</sub>N

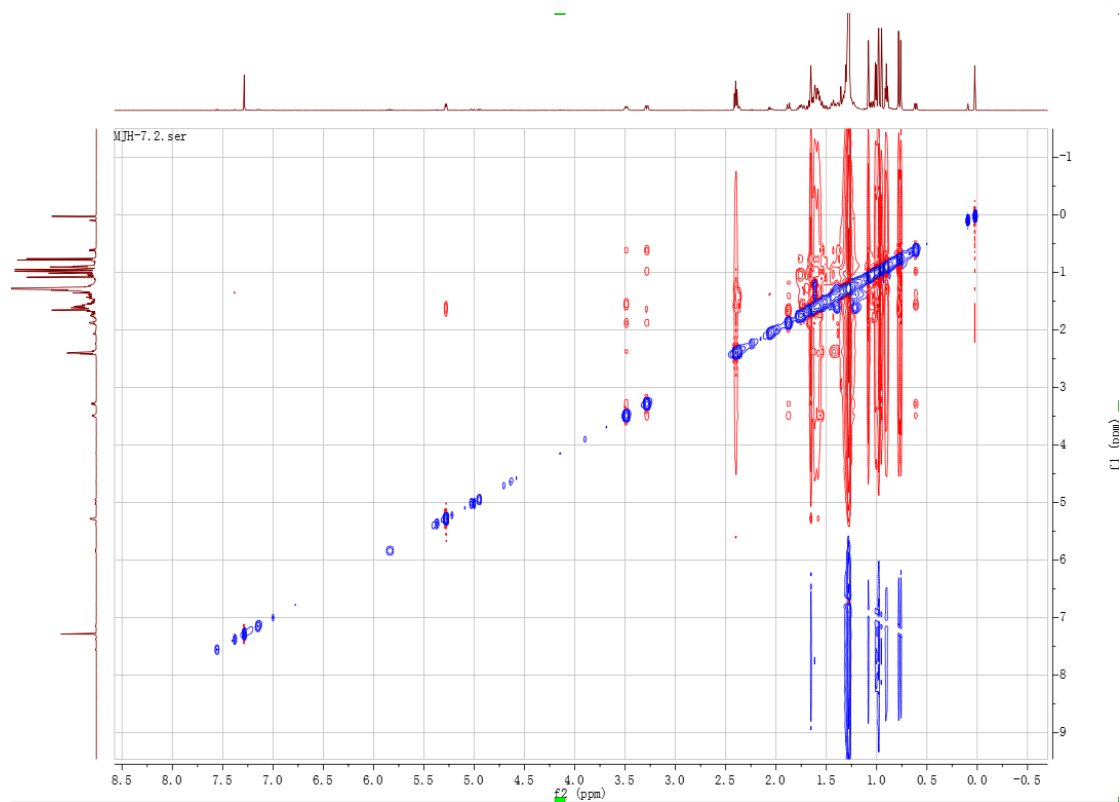

**Figure S17.** NOESY spectrum of compound **7** in  $C_5D_5N$ .

HD-3- #14 RT: 0.06 AV: 1 NL: 1.07E5  
T: FTMS + p ESI Full ms [166.7000-2500.0000]

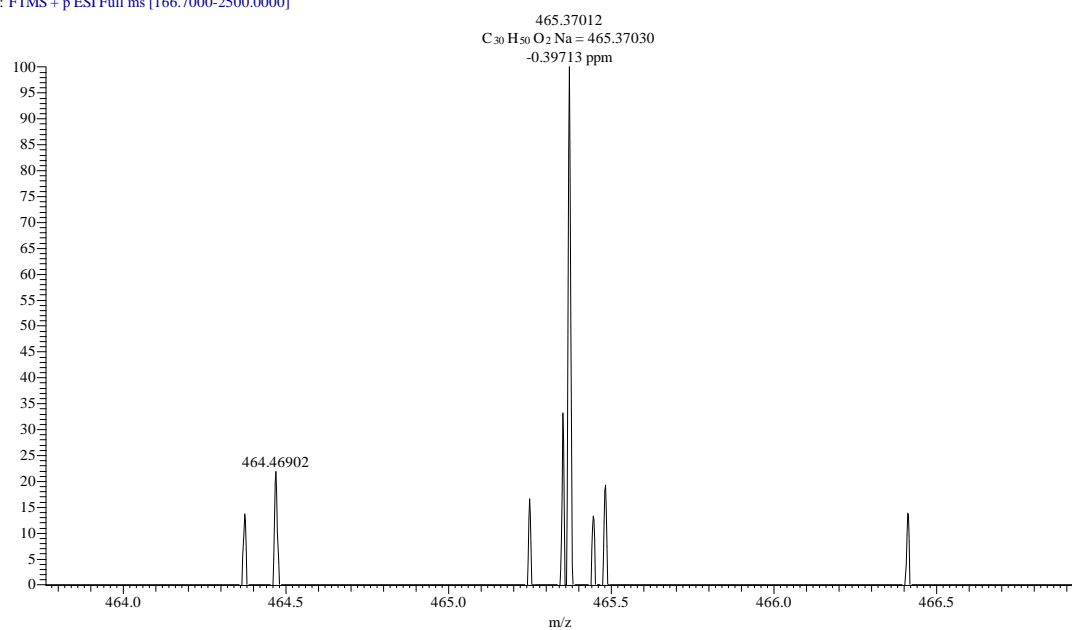

**Figure S18.** HRMS spectrum of compound **7** in  $C_5D_5N$

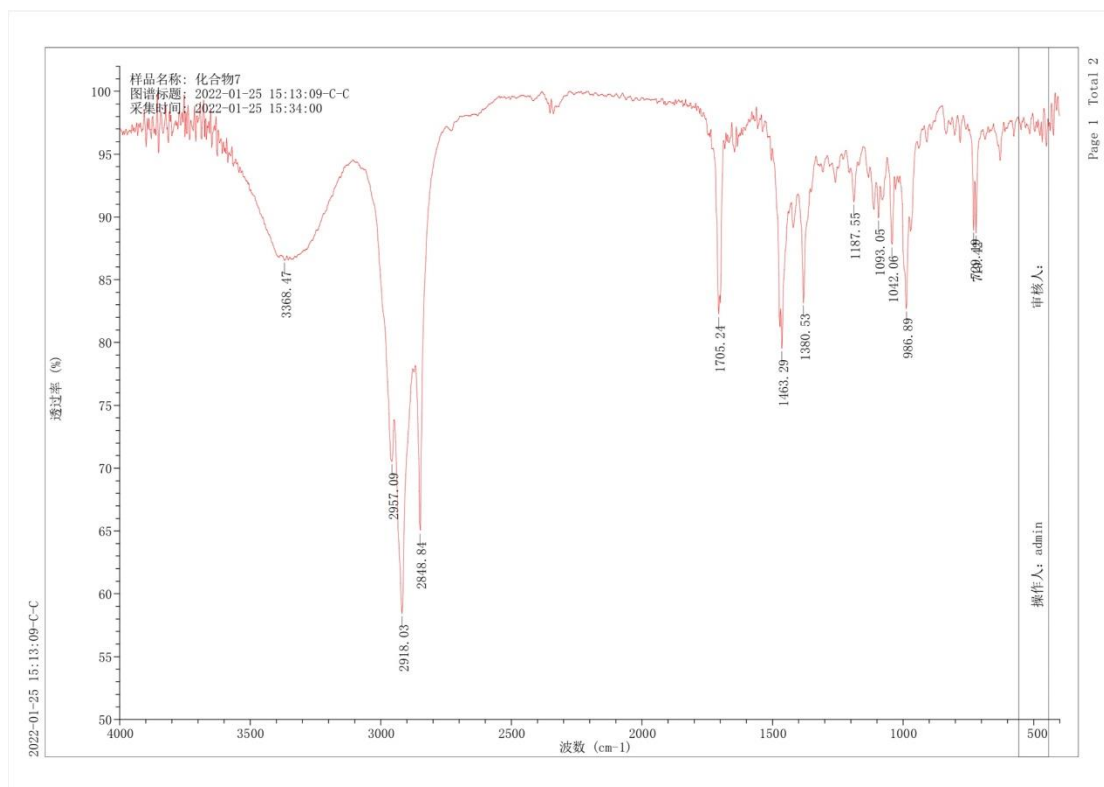

**Figure S19.** IR spectrum of compound 7

| 波数 (cm <sup>-1</sup> ) | %T    |
|------------------------|-------|
| 719.42                 | 88.72 |
| 729.19                 | 88.96 |
| 986.89                 | 82.66 |
| 1042.06                | 87.79 |
| 1093.05                | 89.93 |
| 1187.55                | 91.19 |
| 1380.53                | 83.17 |
| 1463.29                | 79.51 |
| 1705.24                | 82.22 |
| 2848.84                | 65.00 |
| 2918.03                | 58.42 |
| 2957.09                | 70.52 |
| 3368.47                | 86.56 |

**Figure S20.** IR data of compound 7

# Compound 8

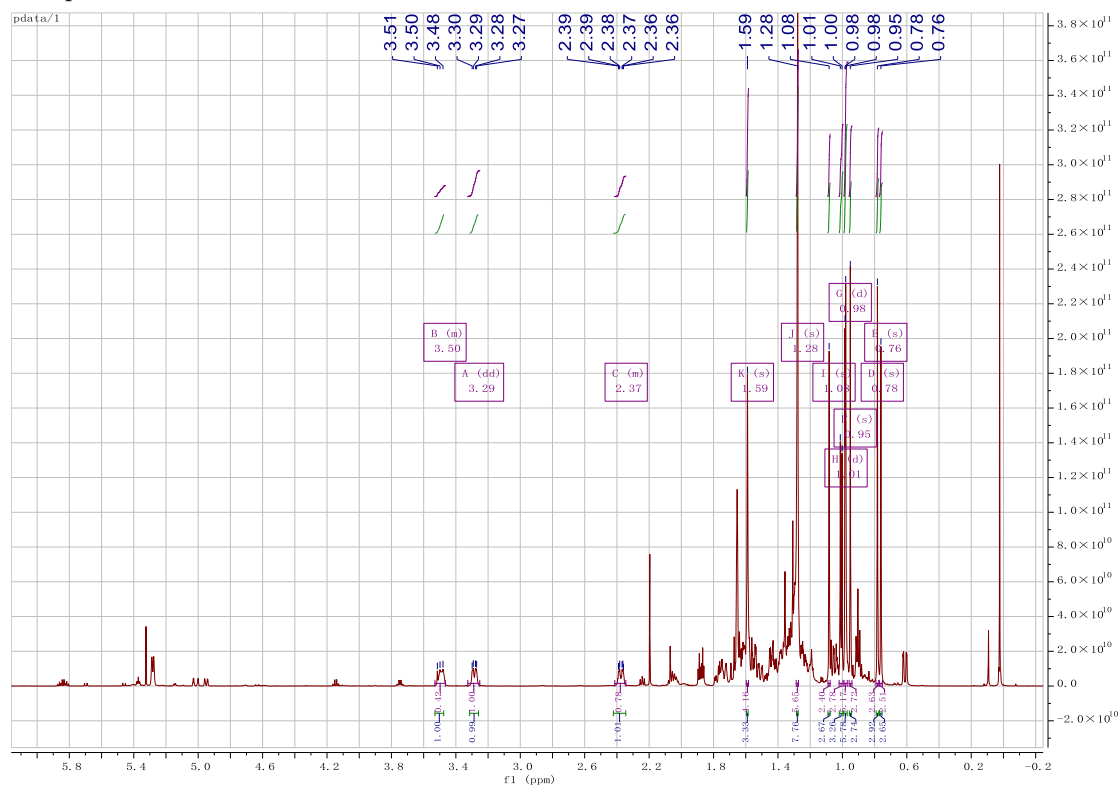

Figure S21.  $^1\text{H}$  NMR spectrum of compound 8 in  $\text{CDCl}_3$  (600 MHz)

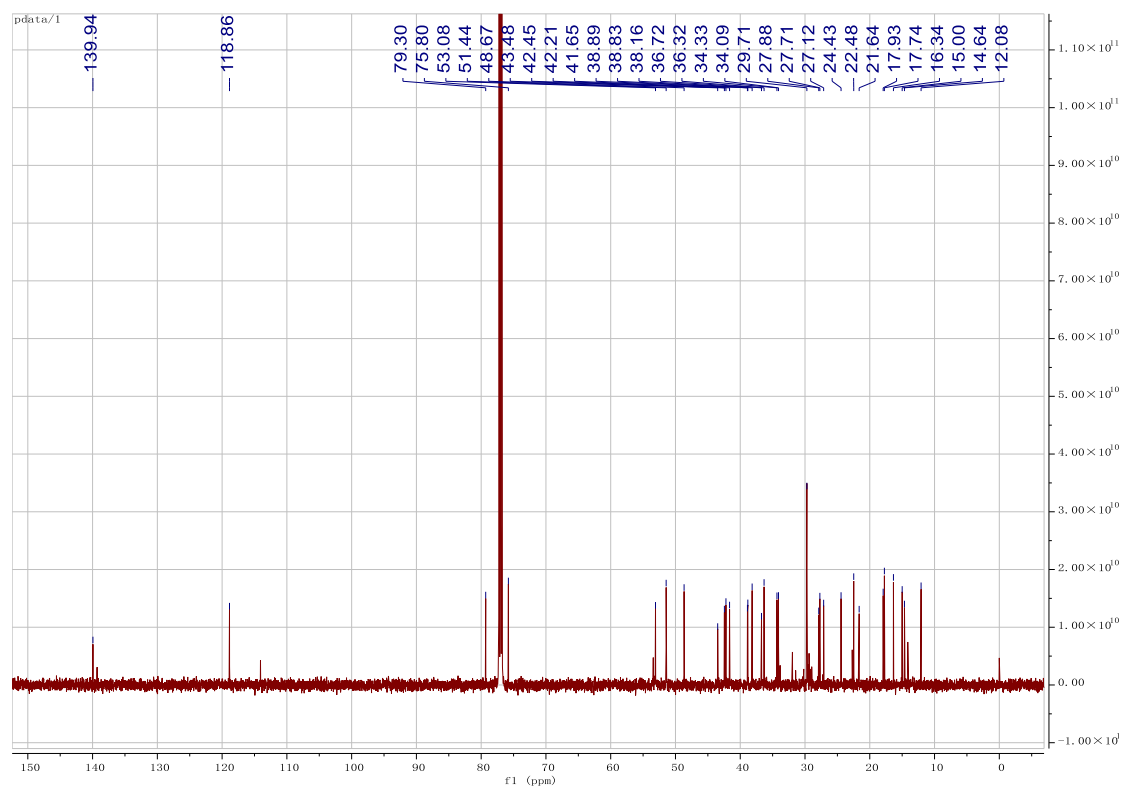

Figure S22.  $^{13}\text{C}$  NMR spectrum of compound 8 in  $\text{CDCl}_3$  (150 MHz)

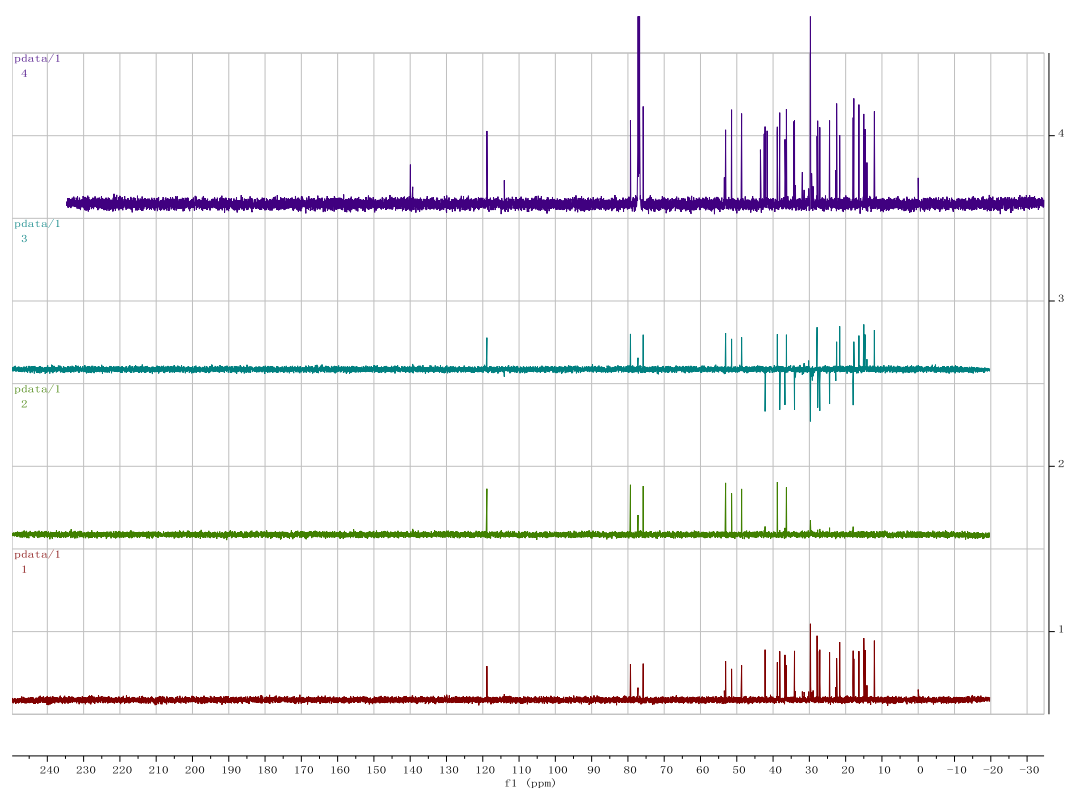

**Figure S23.** DEPT of compound **8** in  $\text{CDCl}_3$  (150 MHz)

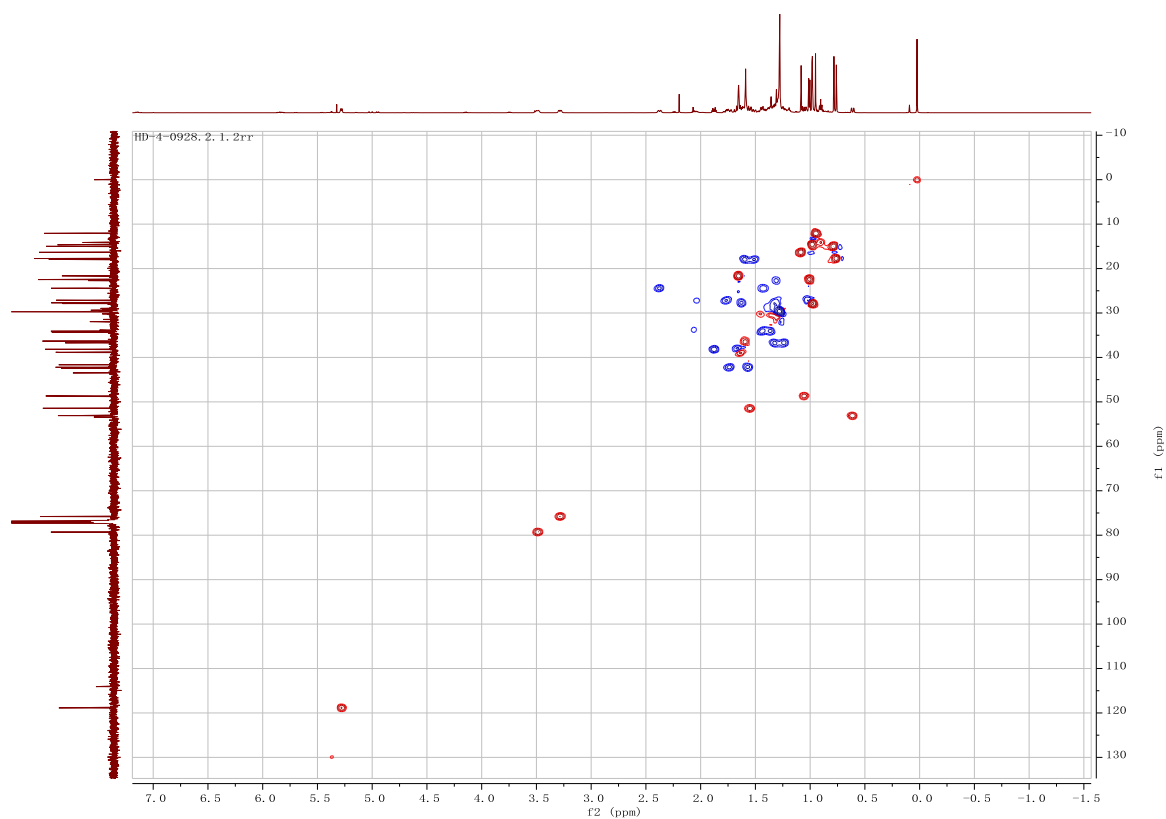

**Figure S24.** HSQC spectrum of compound **8** in  $\text{CDCl}_3$

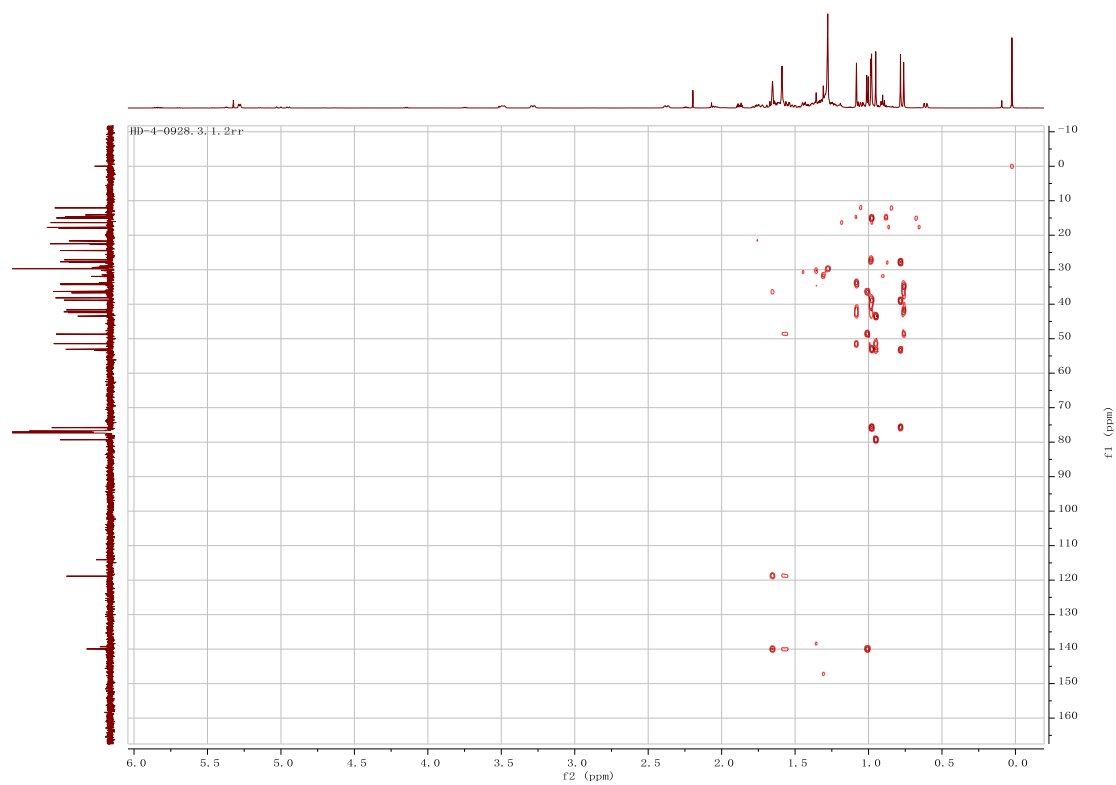

**Figure S25.** HMBC spectrum of compound **8** in  $\text{CDCl}_3$

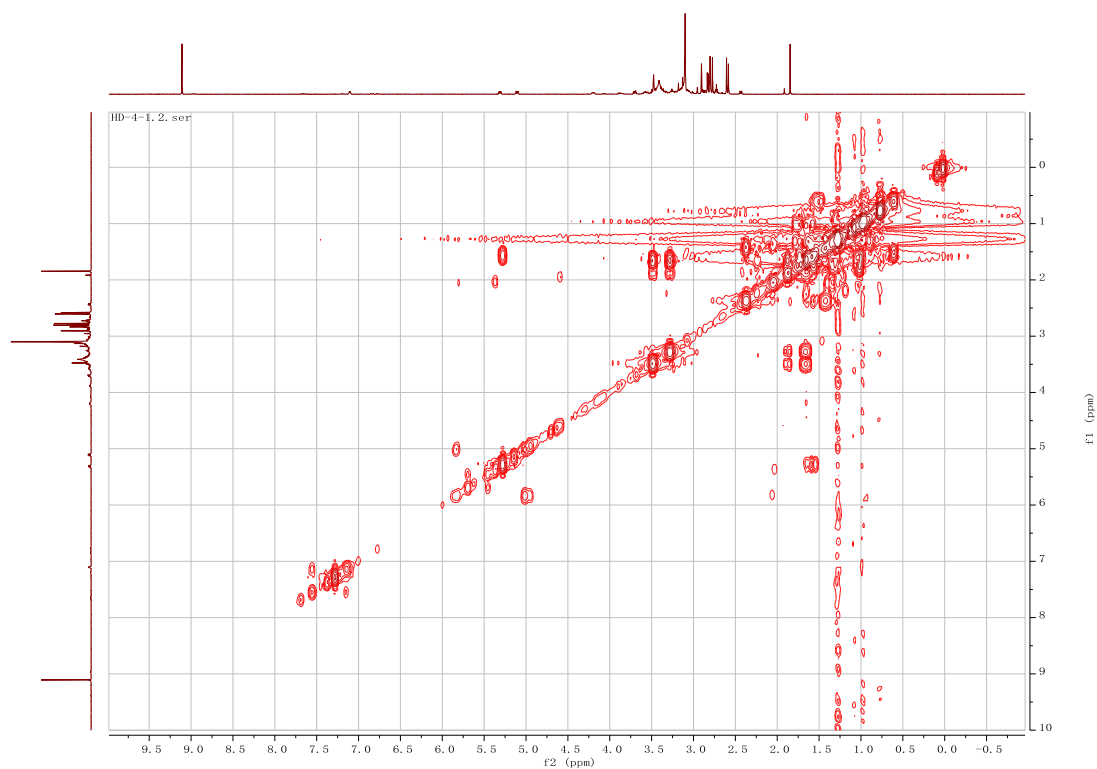

**Figure S26.**  $^1\text{H}$ - $^1\text{H}$  COSY spectrum of compound **8** in  $\text{CDCl}_3$

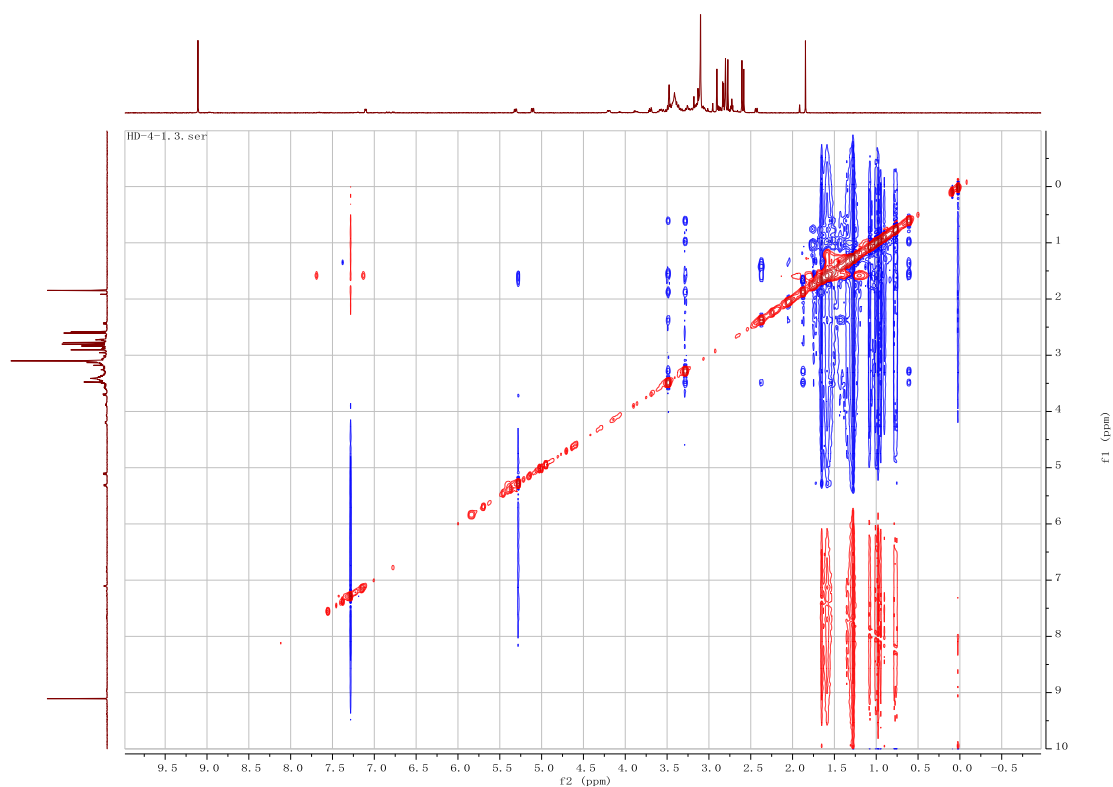

**Figure S27.** NOESY spectrum of compound **8** in  $\text{CDCl}_3$ .

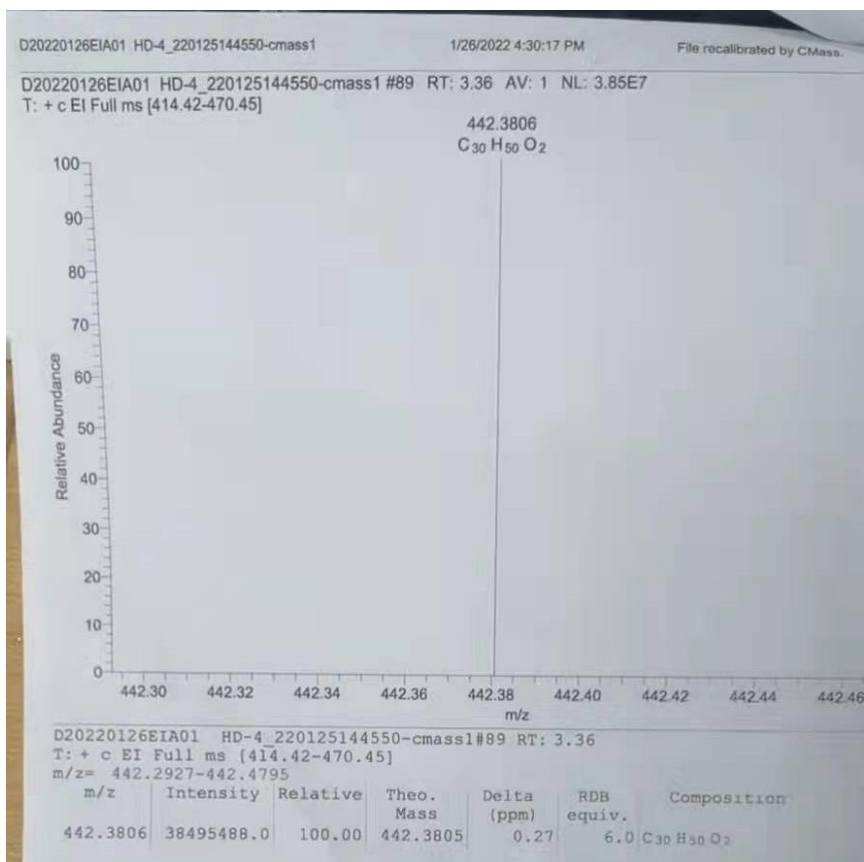

**Figure S28.** HRMS of compound **8** in  $\text{CDCl}_3$ .



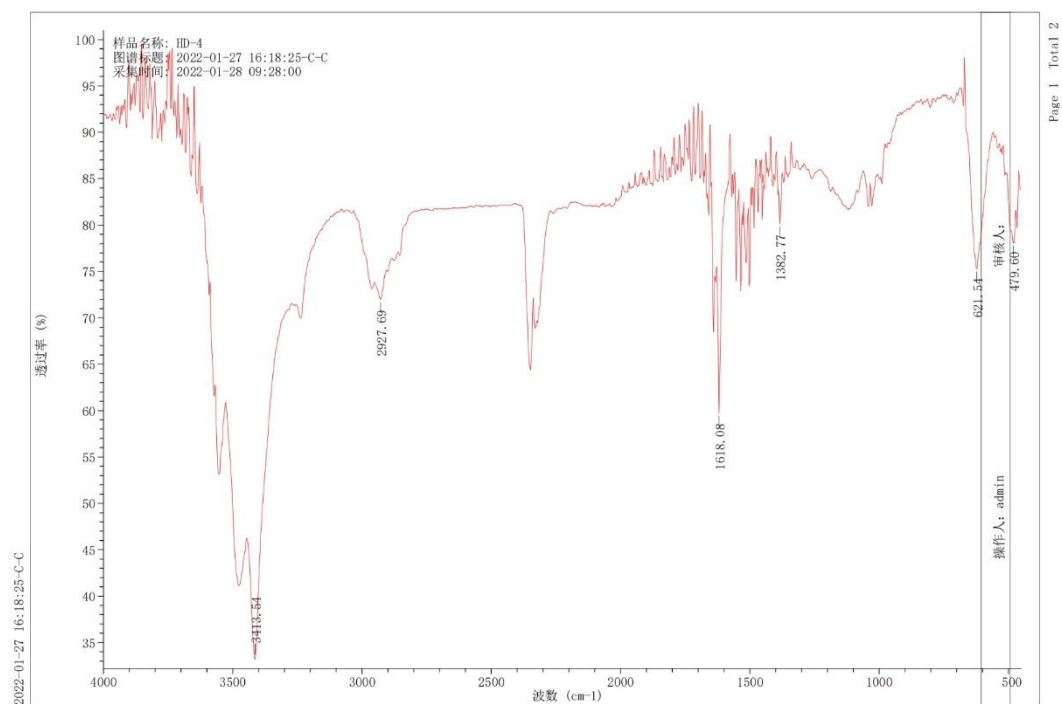

**Figure S29.** IR spectrum of compound **8**

| 波数 (cm <sup>-1</sup> ) | %T    |
|------------------------|-------|
| 412.57                 | 79.51 |
| 479.60                 | 78.06 |
| 621.54                 | 75.25 |
| 1382.77                | 80.13 |
| 1618.08                | 59.73 |
| 2927.69                | 72.00 |
| 3413.54                | 33.20 |

**Figure S30.** IR data of compound **8**

Compound **9**

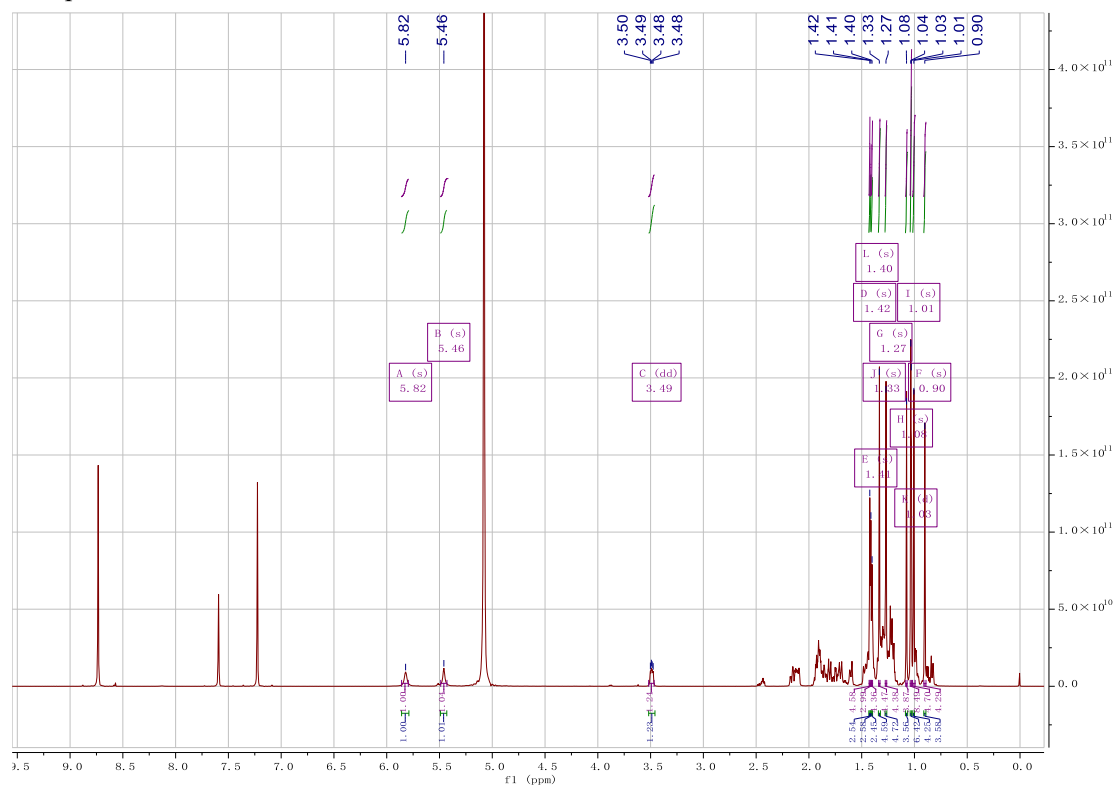

Figure S31. <sup>1</sup>H NMR spectrum of compound **9** in C<sub>5</sub>D<sub>5</sub>N (600 MHz)

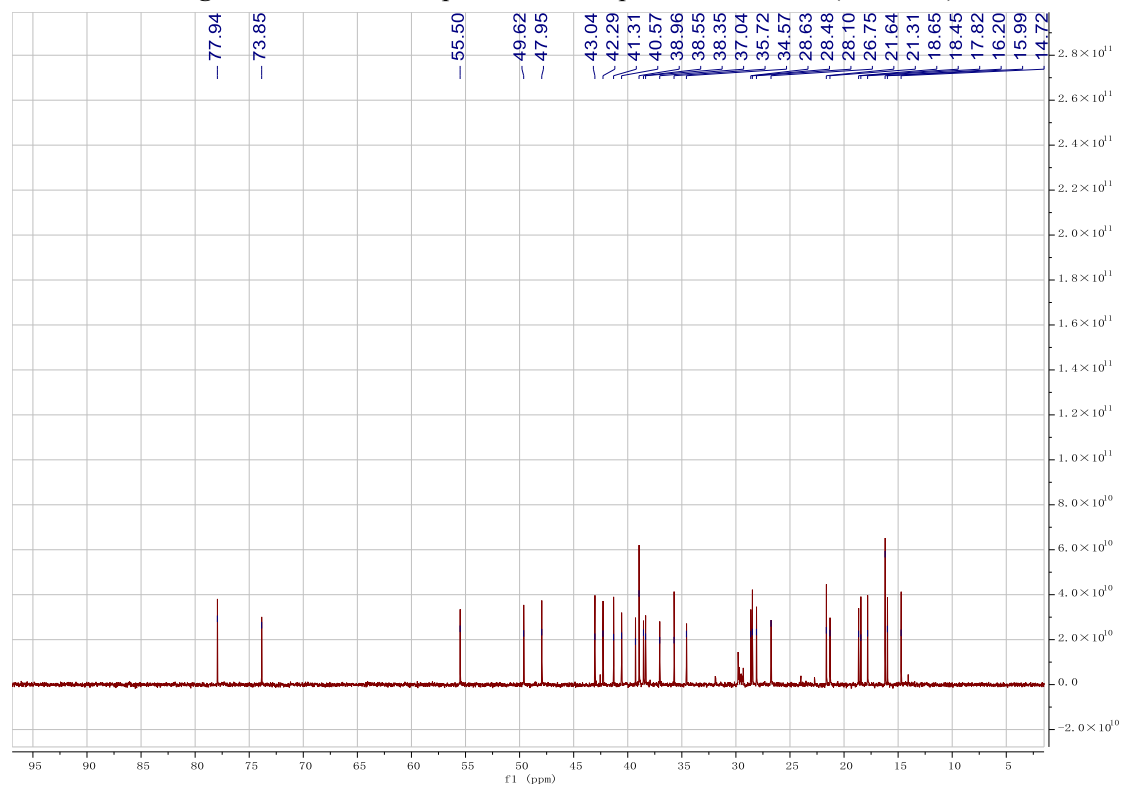

Figure S32. <sup>13</sup>C NMR spectrum of compound **9** in C<sub>5</sub>D<sub>5</sub>N (150 MHz)

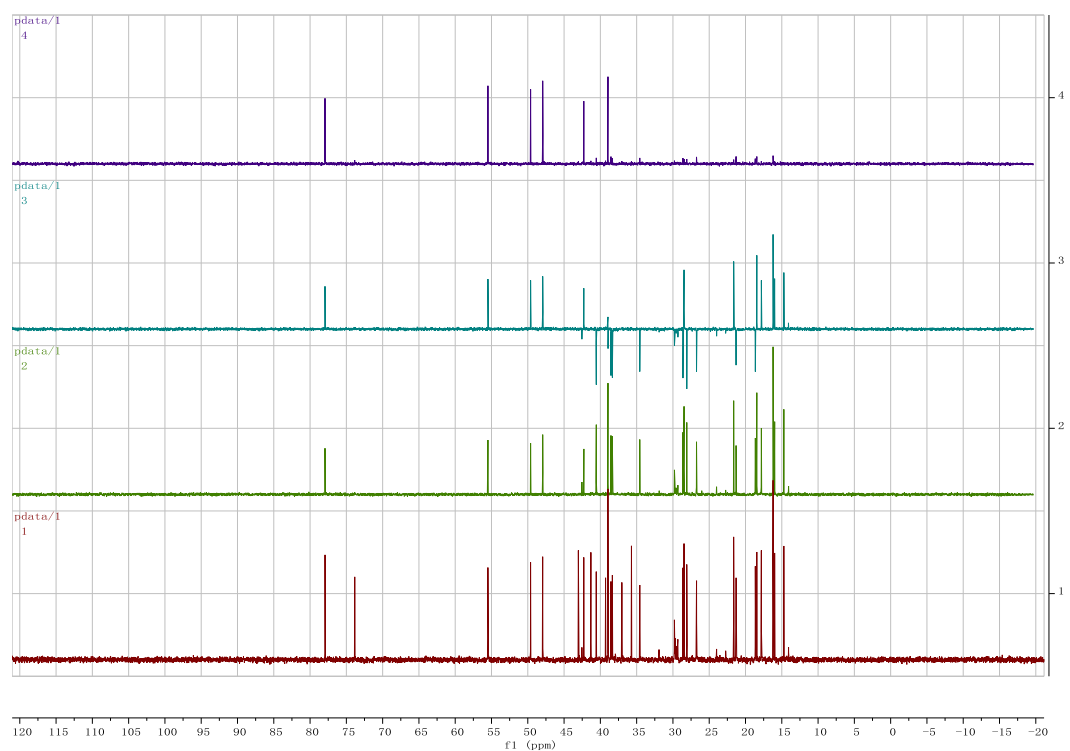

**Figure S33.** DEPT of compound **9** in  $C_5D_5N$  (150 MHz)

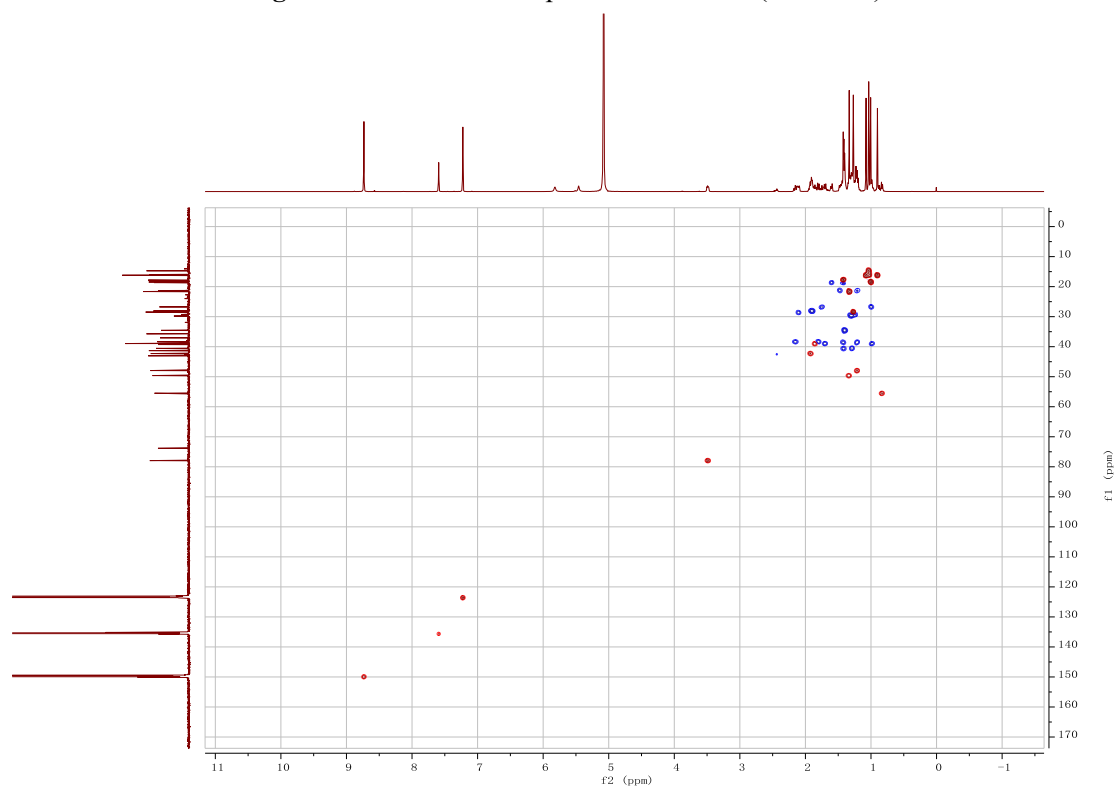

**Figure S34.** HSQC spectrum of compound **9** in  $C_5D_5N$

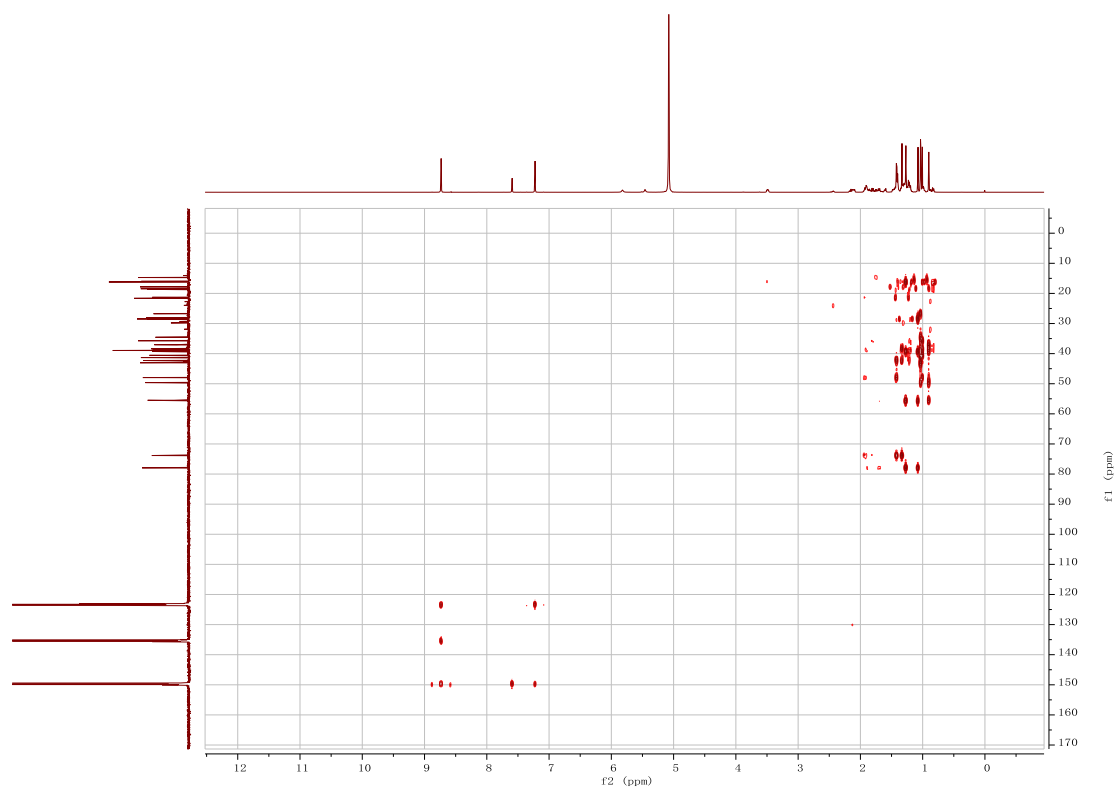

**Figure S35.** HMBC spectrum of compound **9** in  $C_5D_5N$

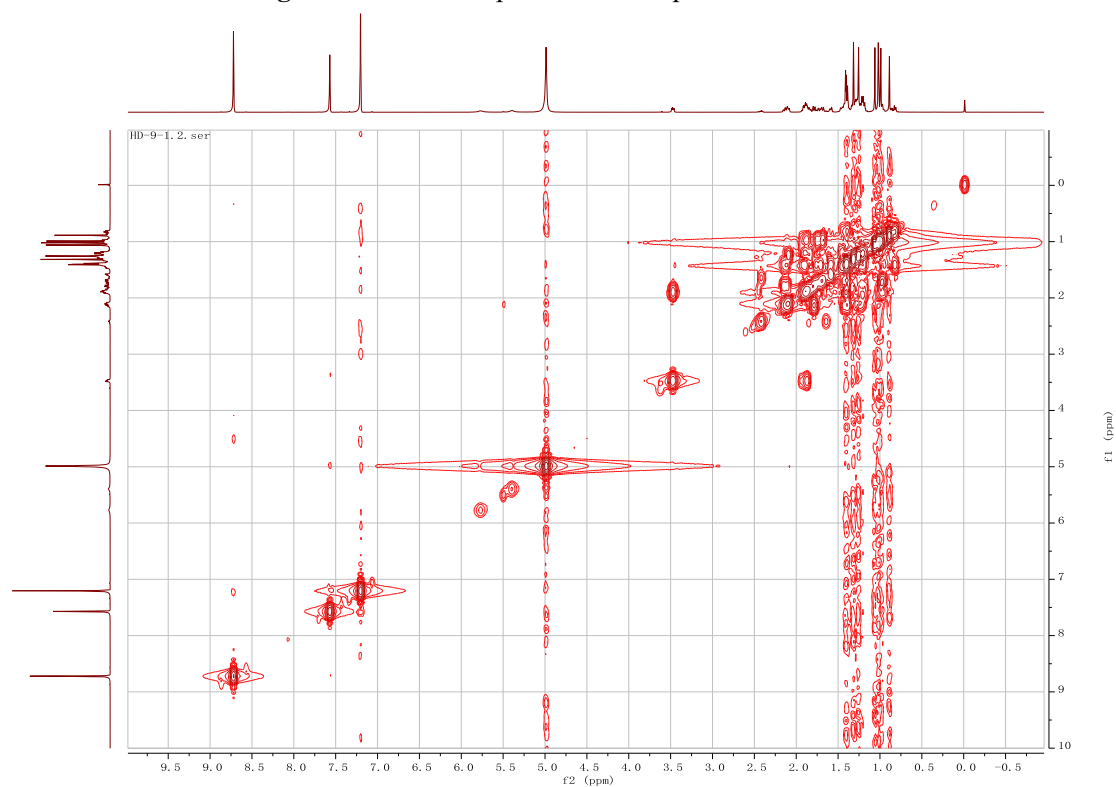

**Figure S36.**  $^1H$ - $^1H$  COSY spectrum of compound **9** in  $C_5D_5N$

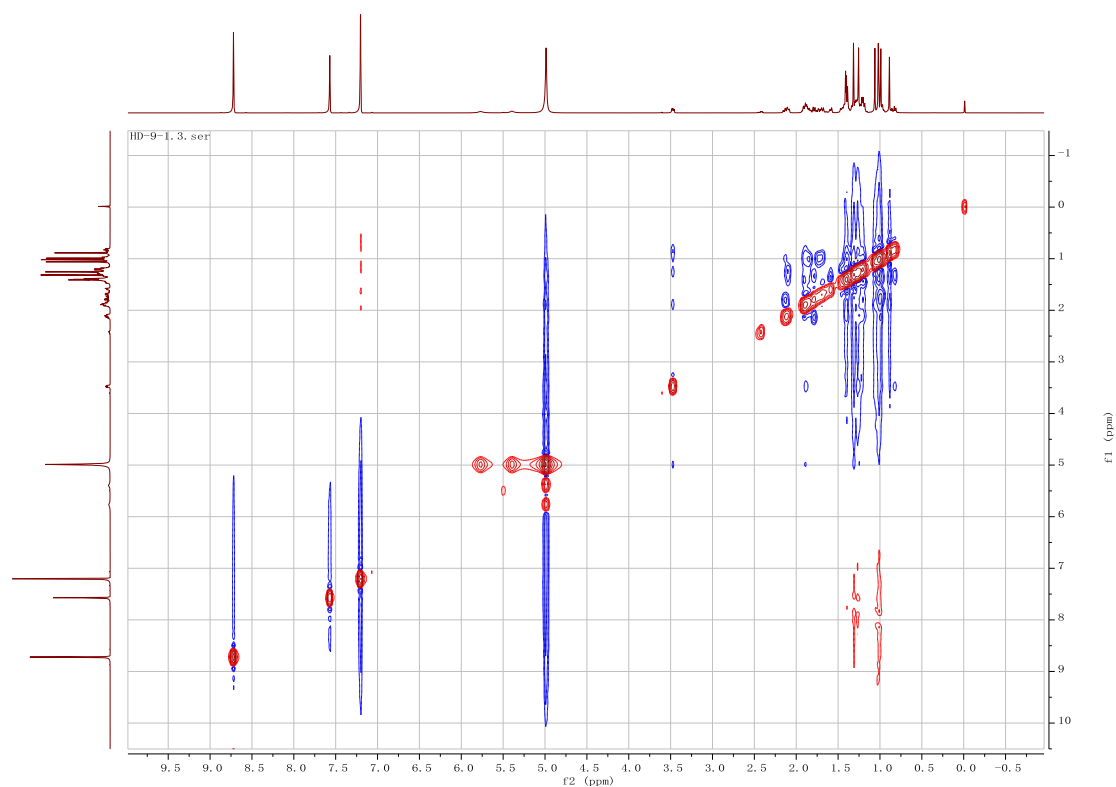

**Figure S37.** NOESY spectrum of compound **9** in  $C_5D_5N$

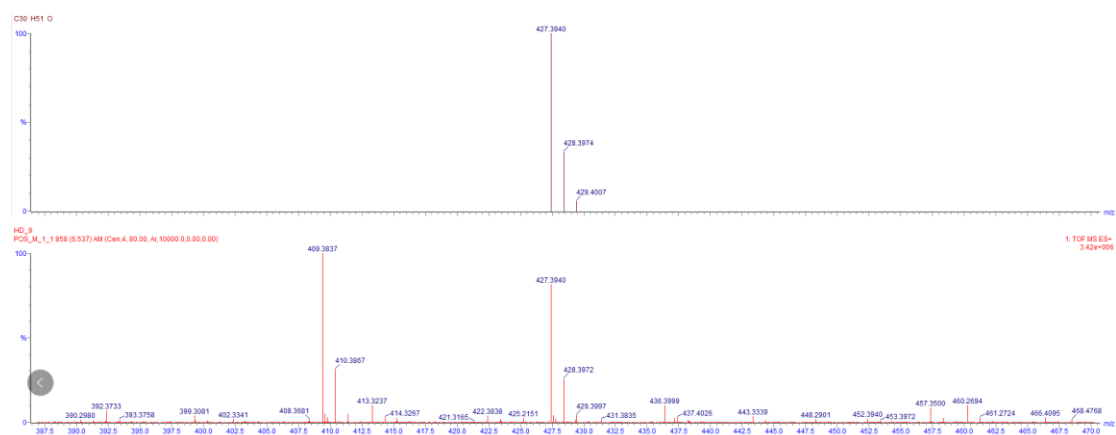

**Figure S38.** HRMS of compound **9** in  $C_5D_5N$

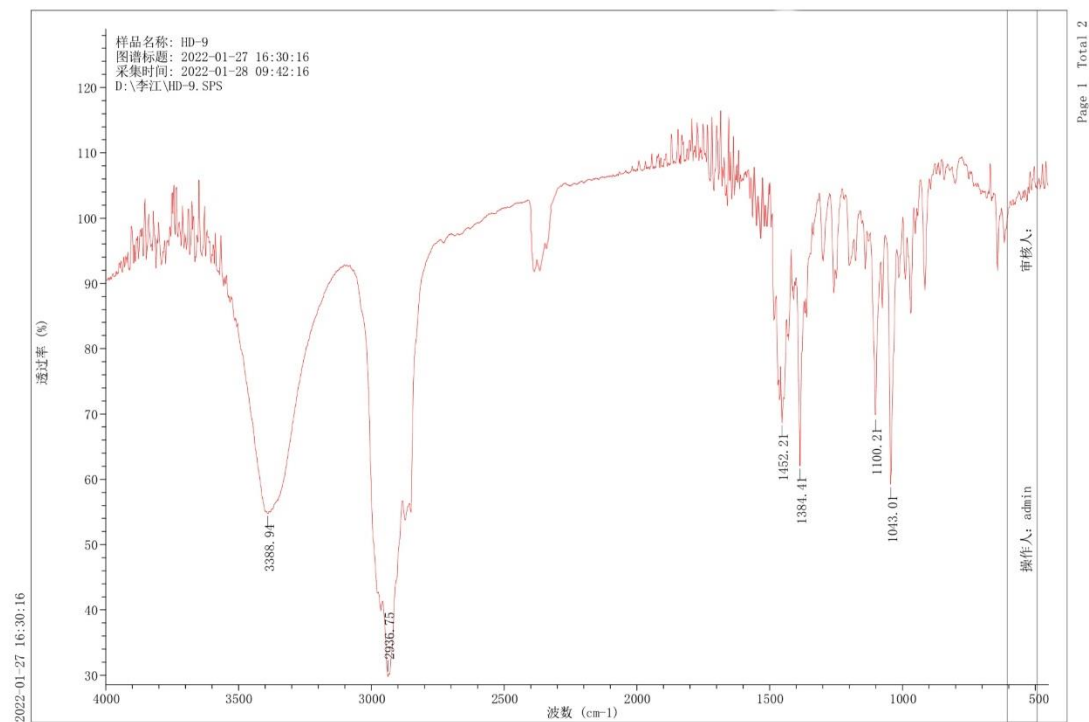

**Figure S39.** IR spectrum of compound **9**

| 波数 (cm-1) | %T    |
|-----------|-------|
| 1043.01   | 59.21 |
| 1100.21   | 69.52 |
| 1384.41   | 62.02 |
| 1452.21   | 68.67 |
| 2936.75   | 29.82 |
| 3388.94   | 54.78 |

**Figure S40.** IR data of compound **9**
